# Supplementary material for: Individualized Fortification Based on Measured Macronutrient Content of Human Milk Improves Growth and Body Composition in Infants Born Less than 33 Weeks: A Mixed-Cohort Study
Source: MDPI journal article supplement (doi:10.3390/nu15061533), 2023-03-22
Supplement: s1 [file s1]

Supplementary Table S1. Comparison between enrolled and not enrolled eligible infants.

| Eligible = 275                                                   | Enrolled           | Not enrolled       | <i>p</i> -value |
|------------------------------------------------------------------|--------------------|--------------------|-----------------|
|                                                                  | 185                | 90                 |                 |
| Gestational age, weeks; mean (SD)                                | 29.6 (2.19)        | 29.6 (2.52)        | 0.567**         |
| Birth weight z-score; median (P <sub>25</sub> -P <sub>75</sub> ) | -0.10 (-0.74-0.28) | -0.31 (-0.85-0.35) | 0.489**         |
| Twins; n (%)                                                     | 56 (30.3)          | 34 (37.8)          | 0.213***        |
| Prenatal steroids; n (%)                                         | 175 (94.6)         | 85 (94.4)          | 1.000*          |
| SNAPPE II; median (P <sub>25</sub> -P <sub>75</sub> )            | 13 (0-25)          | 15 (5-30)          | 0.269**         |
| Extreme preterm; n (%)                                           | 40 (21.6)          | 25 (27.8)          | 0.260***        |

\*Fisher's exact test; \*\* Mann-Whitney U; \*\*\* Chi-Square test

Supplementary Table S2. Comparison between infants completing the exposure period of the study (N=185) and those lost to follow-up.

|                                                                     | Completed exposure<br>period of the study | Lost to follow-up  | <i>p</i> -value |
|---------------------------------------------------------------------|-------------------------------------------|--------------------|-----------------|
|                                                                     | 115                                       | 70                 |                 |
| Gestational age, weeks; mean<br>(SD)                                | 29.6 (2.15)                               | 29.5 (2.27)        | 0.894*          |
| Birth weight z-score; median<br>(P <sub>25</sub> -P <sub>75</sub> ) | -0.03 (-0.62-0.31)                        | -0.35 (-0.82-0.20) | 0.171*          |
| Twins; n (%)                                                        | 39 (33.9)                                 | 17 (24.3)          | 0.167**         |
| Extreme preterm; n (%)                                              | 26 (22.6)                                 | 14 (20.0)          | 0.338**         |
| SNAPPE II; median (P <sub>25</sub> -P <sub>75</sub> )               | 10 (0-24)                                 | 15 (7-29)          | 0.031*          |
| Prenatal steroids; n (%)                                            | 108 (93.9)                                | 67 (95.7)          | 0.316***        |
| Postnatal steroids; n (%)                                           | 5 (4.3)                                   | 3 (5.7)            | 0.642***        |
| Late-onset sepsis; n (%)                                            | 37 (32.2)                                 | 15 (21.4)          | 0.057**         |
| Necrotizing enterocolitis III;<br>n (%)                             | 0                                         | 2 (2.9)            | 0.142***        |
| Intraventricular hemorrhage<br>IV; n (%)                            | 2 (1.7)                                   | 4 (5.7)            | 0.147***        |
| Bronchopulmonary<br>dysplasia; n (%)                                | 10 (8.7)                                  | 5 (7.1)            | 0.354**         |
| Hospital stay, days; median<br>(P <sub>25</sub> -P <sub>75</sub> )  | 46 (34-64)                                | 53 (29.5-71)       | 0.531*          |

\* Mann-Whitney U test; \*\* Chi-Square test; \*\*\* Fisher'exact test

Supplementary Table S3. Comparison between children born at gestational less than 28 weeks and greater than or equal to 28 weeks.

|                                                                    | gestational age at<br>birth < 28 weeks | gestational age at<br>birth ≥ 28 weeks | <i>p</i> -value |
|--------------------------------------------------------------------|----------------------------------------|----------------------------------------|-----------------|
|                                                                    | 26                                     | 89                                     |                 |
| SNAPPE II; median (P <sub>25</sub> ;P <sub>75</sub> )              | 20 (9;30)                              | 13 (0;23)                              | <b>0.033</b>    |
| Late-onset sepsis; n (%)                                           | 18 (69.2)                              | 19 (21.3)                              | 0.003**         |
| Necrotizing enterocolitis III; n<br>(%)                            | 0                                      | 0                                      | -               |
| Intraventricular hemorrhage IV;<br>n (%)                           | 1 (3.8)                                | 1 (1.1)                                | 0.410*          |
| Bronchopulmonary dysplasia; n<br>(%)                               | 6 (23.1)                               | 4 (4.5)                                | 0.018*          |
| Hospital stay, days; median<br>(P <sub>25</sub> ;P <sub>75</sub> ) | 71 (63;99)                             | 40 (31;53)                             | <0,001          |
| Mann-Whitney test; *Fisher' exact test; ** Chi-Square test         |                                        |                                        |                 |

Supplementary Table S4. Comparison between groups, of infants' age before, during, and after exposure, time intervals of exposure, and percentage of exposure days during enteral feeding and hospital stay. Group 1— fortified HM based on its assumed macronutrient content. Group 2— fortified HM based on its measured macronutrient content.

|                                                                                                     | Group 1          | Group 2          | <i>p</i> -<br>value |
|-----------------------------------------------------------------------------------------------------|------------------|------------------|---------------------|
|                                                                                                     | N=57             | N=58             |                     |
| Gestational age (wks) at beginning of the exposure, in weeks; mean (SD)                             | 31.5 (1.975)     | 31.45 (2.01)     | 0.412               |
| Age at beginning of exposure, in days; median (P <sub>25</sub> ;P <sub>75</sub> )                   | 11 (9;13)        | 11 (8;14)        | 0.721               |
| Postmenstrual age at the end of exposure, in weeks; mean (SD)                                       | 31.1 (1.98)      | 31.5 (2.01)      | 0.412               |
| Postmenstrual age at hospital discharge, in weeks; mean (SD)                                        | 36.2 (1.21)      | 37.0 (2.40)      | 0.082               |
| Time interval before exposure (days); median (P <sub>25</sub> ;P <sub>75</sub> )                    | 10.0 (9.0-12.0)  | 11.0 (8.0-14.0)  | 0.126               |
| Time interval during exposure (days); median (P <sub>25</sub> ;P <sub>75</sub> )                    | 28.0 (17.5-50.0) | 23.0 (16.0-36.0) | 0.072               |
| Time interval from end of exposure and discharge (days); median (P <sub>25</sub> ;P <sub>75</sub> ) | 7.0 (3.0-12.0)   | 9.5 (5.0 19,3)   | 0.191               |
| Percentage of exposure days during enteral feeding; mean (SD)                                       | 60.2 (20.83)     | 56.3 (18.82)     | 0.300               |
| Percentage of exposure days during hospital stay; mean (SD)                                         | 53.4 (19.89)     | 50.9 (17.02)     | 0.588               |

SD – standard deviation; Student-t test, Chi-Square test, Fisher's exact test, median test, or Mann-Whitney test as appropriate

Supplementary Table S5. Proportions of exposure days in which the intake of energy, P/E, and macronutrients did not reach the minimum recommended or exceeded the maximum recommended intakes (N=115). Group 1— fortified HM based on its assumed macronutrient content. Group 2— fortified HM based on its measured macronutrient content.

|                                                                                                  | Recommended<br>by ESPGHAN<br>2010*                           | Group 1 | Group 2 | <i>p-value</i>    |
|--------------------------------------------------------------------------------------------------|--------------------------------------------------------------|---------|---------|-------------------|
|                                                                                                  |                                                              | N=57    | N=58    |                   |
| Energy intake, kcal/kg/d                                                                         | 110-135                                                      |         |         |                   |
| Proportion of days (%) in<br>which the energy intake<br>did not reach the<br>minimum recommended |                                                              | 32.6    | 12.1    | <b>&lt;0.001</b>  |
| Proportion of days (%) in<br>which the energy intake<br>exceeded the maximum<br>recommended      |                                                              | 25.8    | 30.2    | <b>0.002</b>      |
| Protein intake, g/kg/d                                                                           | < 1 Kg body weight: 4.0-4.5<br>1-1.8 Kg body weight: 3.5-4.0 |         |         |                   |
| Proportion of days (%) in<br>which protein intake did<br>not reach the minimum<br>recommended    | <1 kg body<br>weight                                         | 31.3    | 31.4    | 0.494*            |
|                                                                                                  | ≥ 1 kg body<br>weight                                        | 25.0    | 15.5    | 0.047*            |
| Proportion of days (%) in<br>which the protein intake<br>exceeded the maximum<br>recommended     | <1 kg body<br>weight                                         | 51.5    | 46.4    | 0.235*            |
|                                                                                                  | ≥ 1 kg body<br>weight                                        | 51.9    | 54.2    | 0.372*            |
| Protein-to energy ratio                                                                          | < 1 Kg body weight: 3.6-4.1<br>1-1.8 g body weight: 3.2-3.6  |         |         |                   |
| Proportion of days (%) in<br>which the protein-to<br>energy ratio intake did                     | <1 kg body<br>weight                                         | 34.3    | 1.3     | <b>&lt; 0.001</b> |

|                                                                                                     |                    |      |      |         |
|-----------------------------------------------------------------------------------------------------|--------------------|------|------|---------|
| not reach the minimum recommended                                                                   | ≥ 1 kg body weight | 27.8 | 0    | < 0.001 |
| Proportion of days (%) in which the protein-to energy ratio intake exceeded the maximum recommended | <1 kg body weight  | 54.5 | 95.4 | < 0.001 |
|                                                                                                     | ≥ 1 kg body weight | 56.8 | 99.3 | < 0.001 |

---

|                                                                                      |                |      |      |        |
|--------------------------------------------------------------------------------------|----------------|------|------|--------|
| Fat intake, g/kg/d                                                                   | 4.8-6.6 g/kg/d |      |      |        |
| Proportion of days (%) in which the fat intake did not reach the minimum recommended |                | 37.6 | 20.2 | <0.001 |
| Proportion of days (%) in which the fat intake exceeded the maximum recommended      |                | 23.3 | 46.5 | <0.001 |

---

|                                                                                           |                  |      |      |        |
|-------------------------------------------------------------------------------------------|------------------|------|------|--------|
| Carbohydrate intake, g/kg/d                                                               | 11.6-13.2 g/kg/d |      |      |        |
| Proportion of days (%) in which carbohydrate intake did not reach the minimum recommended |                  | 37.6 | 20.2 | <0.001 |
| Proportion of days (%) in which the carbohydrate intake exceeded the maximum recommended  |                  | 23.3 | 46.5 | <0.001 |

---

Chi-Square test

\* Agostoni C, Buonocore G, Carnielli VP, et al. Enteral nutrient supply for preterm infants: Commentary from the European Society of Paediatric Gastroenterology, Hepatology and Nutrition Committee on Nutrition. J Pediatr Gastroenterol Nutr. 2010;50(1):85-91.  
doi:10.1097/MPG.0b013e3181adaee0
